# Growth of European hake (*Merluccius merluccius*) in the Gulf of Lions based on conventional tagging

Capucine Mellon-Duval, H el ene de Pontual, Luisa M etral, and Loic Quemener

Mellon-Duval, C., de Pontual, H., M etral, L., and Quemener, L. 2010. Growth of European hake (*Merluccius merluccius*) in the Gulf of Lions based on conventional tagging. – ICES Journal of Marine Science, 67: 62–70.

Growth of European hake was estimated from the results of a conventional tagging study in the Gulf of Lions, the first tagging experiment to have been undertaken on the species in Mediterranean waters. In all, 4277 hake 15–40 cm long were tagged and released on the inshore fishing grounds during spring 2006. The overall recapture rate was 6.5% and times-at-liberty ranged from 1 to 717 d. Growth rate in hake varied with size and sex. The estimated growth parameter (von Bertalanffy  $k$ ) was estimated as double previously published values based on size frequency distribution in the area. Compared with recent growth parameters derived from the tagging experiments in the Bay of Biscay,  $k$  was estimated to be slightly lower in the Gulf of Lions. With this faster growth, hake would mature earlier than previously thought: at age 2 for both sexes, instead of at age 3 or 4 as currently accepted for the Mediterranean. Growth rate by sex decreased to a similar level once fish had attained sexual maturity.

**Keywords:** age estimation, European hake, growth, Mediterranean, tagging.

Received 27 November 2008; accepted 1 July 2009; advance access publication 12 August 2009.

C. Mellon-Duval and L. M etral: Centre de Recherche Halieutique M editerran enne et Tropicale, Ifremer, Laboratoire Ressources Halieutiques, Avenue Jean Monnet, BP 171, 34203 S ete Cedex, France. H. de Pontual: Ifremer, D epartement des Sciences et Technologies Halieutiques, BP 70, F-29280 Plouzan e, France. L. Quemener: Ifremer, Laboratoire de Technologie des Syst emes Instrumentaux, BP 70, F-29280 Plouzan e, France. Correspondence to C. Mellon-Duval: tel: +33 4 99 57 32 47; fax: +33 4 99 57 32 95; e-mail: capucine.mellon@ifremer.fr.

## Introduction

The European hake (*Merluccius merluccius*) is both commercially and ecologically important in the ecosystem of the Gulf of Lions (northwestern Mediterranean off southern France, Figure 1). With a broad spatial distribution, from the coast to the continental slope, and a diet based on small pelagic fish (Ferraton *et al.*, 2007), it plays a basic ecological role in the area. Hake are found over a range of environmental conditions, which may influence its population parameters. In the Gulf of Lions, it is a major focus for stock assessment because it is the dominant commercial demersal species (Aldebert and Carries, 1988; Oliver and Massut ı, 1995; Aldebert and Recasens, 1996), with catches principally of juveniles. For these reasons, better understanding of its biological parameters is essential.

Despite many biological studies on European hake having been carried out, age estimation remains a challenging task (Morales-Nin *et al.*, 1998; Courbin *et al.*, 2007). In the Mediterranean, most growth analyses have been based on the size-at-age data derived from either length frequency analyses (Bouhlal and Ktari, 1975; Orsi-Relini *et al.*, 1989; Recasens, 1992; Aldebert and Recasens, 1995; Morales-Nin and Aldebert, 1997) or interpretation of the otolith macrostructure (Morales-Nin *et al.*, 1998). Unlike many fish species, the otoliths of hake have not been used successfully to construct a growth model because of many difficulties in interpreting patterns of macrostructure (Oliver *et al.*, 1989; Morales-Nin *et al.*, 1998). However, analyses of otolith microincrements have recently enhanced knowledge of hake growth in early life stages both in

the Mediterranean (Morales-Nin and Aldebert, 1997; Arneri and Morales-Nin, 2000; Morales-Nin and Moranta, 2004; Belcari *et al.*, 2006) and in the Atlantic (Kacher and Amara 2005; Pi neiro *et al.*, 2008). A first attempt to analyse otolith macrostructure was recently conducted on hake from the Gulf of Lions (Courbin *et al.*, 2007). Another was made on hake taken in the Gulf of Alicante, and a fast-growth hypothesis was tested based on otolith interpretation and length frequency distribution (Garcia-Rodriguez and Esteban, 2002).

Although tag-recapture experiments have been used commonly to study fish growth, the first successful experiment on tagging hake is only recent (de Pontual *et al.*, 2003). Most studies using conventional T-tag techniques have proved to be an effective method for growth analysis. However, because recovery rates are variable and sometimes low, especially for fish, the use of such a method requires substantial tagging effort to gain sufficient data for estimating growth accurately. The first tagging experiments successfully carried out with hake in the Bay of Biscay showed that hake growth was being underestimated when based on direct otolith interpretation (de Pontual *et al.*, 2006).

The growth of hake in the Mediterranean has never been validated. Hake live in many areas of the eastern and western Mediterranean. The literature on age and growth in different areas, published since the 1950s, reports various estimates of growth parameters, growth rates, and otolith interpretation. Most of the studies indicated a von Bertalanffy  $k$  parameter of  $\sim 0.1 \text{ year}^{-1}$ . However, we are aware of three studies (Alemany and Oliver, 1995; Garcia-Rodriguez and Esteban, 1996, 2002)

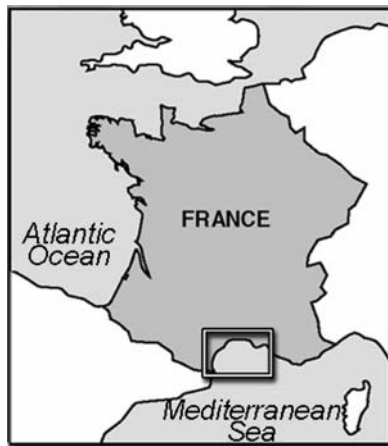

**Figure 1.** Map showing the location of the Gulf of Lions (box) in southern France where hake were tagged for the growth study between April and May 2006.

that have suggested a higher growth rate ( $k$  of  $\sim 0.2 \text{ year}^{-1}$ ). Recent progress on growth estimation of juvenile hake has been made based on interpretation of daily otolith increments (Arneri and Morales-Nin, 2000; Morales-Nin and Moranta, 2004; Belcari *et al.*, 2006). Yet, little is known about the growth of older fish.

Here, we report the results of the first tag-recapture experiment made in the Gulf of Lions, carried out in 2006 to estimate hake growth based on a 2-year period of recapture data. Mean growth rates and individual growth variability are used to examine differences in growth between sexes and by length category. We estimated von Bertalanffy parameters from recaptured fish and compared them with estimates previously obtained in the same area derived from the length frequency analysis (Aldebert and Recasens, 1995). We then compared European hake growth in the Gulf of Lions (Mediterranean) with that in the Bay of Biscay (Atlantic), using published data derived from tagging experiments (de Pontual *et al.*, 2006).

## Material and methods

The tagging experiment was performed in the Gulf of Lions from 15 April to 15 May 2006, between  $42^{\circ}15'$  and  $43^{\circ}35'N$ , and  $3^{\circ}00'$  and  $6^{\circ}00'E$ , an area of known high density of hake. Fish were caught in a four-panel bottom trawl (high opening) equipped with a codend specially designed to minimize mortality (de Pontual *et al.*, 2003). Hauls lasted 10–15 min at a speed of 3 knots and were performed on the continental shelf 30–60 m deep. On board, the swimbladder of all hake captured was perforated to enhance survival, then the fish were placed in a tank supplied with flowing seawater.

All fish were tagged using numbered FD-94 or FD-68B (depending on fish length size) Floy T-bar anchor tags inserted in the muscle of the fish below the first dorsal fin. After tagging and measurement ( $TL$ , total length to the nearest millimetre), fish were retained in tanks for a period of 30 min to  $\sim 4$  h. Releases were made twice per day at different locations, selected to preclude their immediate recapture.

The tagging experiment was advertised in local newspapers, on the radio, and via posters to fisher organizations and in fish markets. A reward of €50 was offered for each tagged fish returned to the laboratory giving the date and location of capture. Such fish

were frozen individually, then defrosted for measuring, weighing, and sex determination.

## Growth analysis and modelling

We estimated growth rates (length increment  $\Delta L$ /time-at-liberty  $\Delta T$ ) separately for each sex and for sexes combined. Daily growth rates ( $\text{cm d}^{-1}$ ) were tested for differences by sex, time-at-liberty, and length. Growth rates were examined for four different length-at-release categories (15–19, 20–24, 25–29, and 30–44 cm) to analyse both juvenile and adult stages. The  $L_{50}$  in the Gulf of Lions, the size at which 50% of fish are mature, is currently thought to be 38.0 cm for females and 28.8 cm for males (Recasens *et al.*, 1998). Consequently, the first length category only included juveniles (of both sexes), the second and the third contained juvenile females and maturing males, and the fourth consisted of maturing females (no males were found). The few fish 30–44 cm  $TL$  tagged (just 3% of the total) are not considered a representative sample so are generally not analysed further. The growth rates of fish tagged when  $< 30$  cm were compared between those that had spent either more or less than 1 year at liberty. More than 1 year at liberty is considered to be a significant time-at-liberty and therefore to give a better understanding of the growth of fish tagged at the same length. Differences between groups were tested for significance using  $t$ -tests or ANOVA, after checking normality of the data distribution (Kolmogorov–Smirnov test) and variance homogeneity (Levene test). A  $t$ -test for non-homogeneous variance (SPSS, 2008) was used when required. Tukey tests were performed for *post hoc* comparison between factor modalities. The significance level for all tests was  $p < 0.05$ .

Hake growth in the Gulf of Lions was estimated by fitting a von Bertalanffy model [ $L = L_{\infty}(1 - e^{-k(t-t_0)})$ ] to data obtained from the recaptured fish. The form of the equation when using tagging data is

$$\Delta L = (L_{\infty} - L_1)(1 - e^{-k\Delta T}), \quad (1)$$

where  $\Delta L = L_2 - L_1$  (length increment), with  $L_1$  the length at release and  $L_2$  the length at recapture,  $L_{\infty}$  the asymptotic length corresponding to the length the fish would attain if it grew to an infinite age,  $k$  the growth constant at which  $L_{\infty}$  is approached, and  $\Delta T$  the time-at-liberty (between release and recapture).

The linear trend (Figure 2) of the relationship between  $\Delta L$  as a function of  $\Delta T$  [ $r^2 = 0.78$  for sexes combined ( $p < 0.001$ ),  $r^2 = 0.86$  for females ( $p < 0.001$ ), and  $r^2 = 0.65$  for males ( $p < 0.001$ )] indirectly indicates that recoveries mainly consisted of fish tagged as juveniles, when growth is fast and almost linear. As a consequence,  $L_{\infty}$  might be difficult to estimate because older fish are missing. This is the reason three different von Bertalanffy growth models were fitted, using non-linear regression procedures in SPSS Software 17 (SPSS, 2008). To compare growth estimated in the same area based on the length frequency method (Aldebert and Recasens, 1995), we fixed  $L_{\infty}$  in our first model to the value obtained by those authors and only estimated  $k$ . In our second model, both  $L_{\infty}$  and  $k$  were estimated,  $L_{\infty}$  being constrained to ranges consistent with the maximum lengths known for both males and females. Finally, in our third model,  $k$  was estimated with  $L_{\infty}$  fixed at the value obtained in the Bay of Biscay for sexes combined. Confidence intervals (CIs) were estimated by bootstrap for the first two models and asymptotically for the

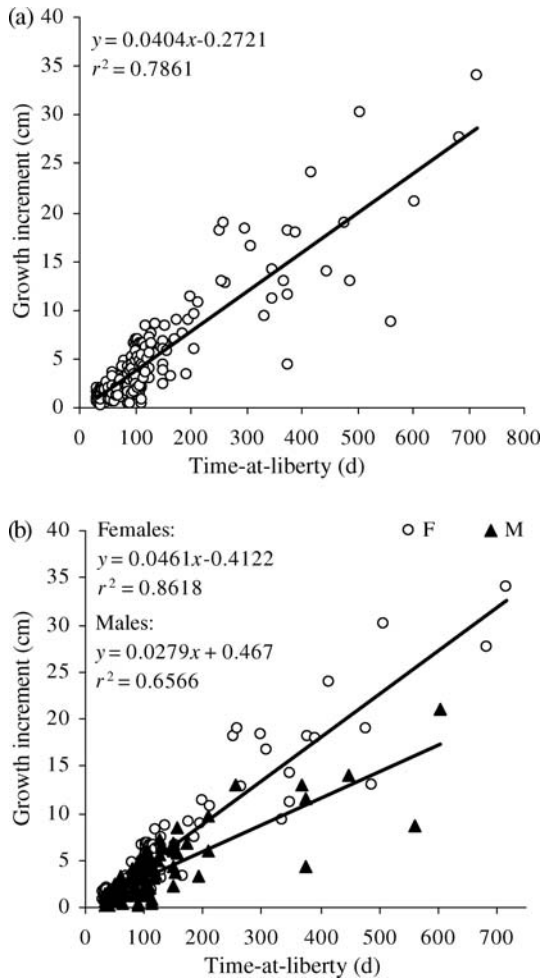

**Figure 2.** Growth increment ( $\Delta L$ ) plotted against time-at-liberty ( $\Delta T$ ) of hake tagged in the Gulf of Lions in 2006. (a) Combined sexes. (b) Separate sexes (F, female; M, male).

third, because the last method was used in the Atlantic analysis by de Pontual *et al.* (2006).

## Results

In all, 4277 hake were tagged and released during this first experiment, and to the time of writing (end of August 2008), 280 have been recaptured, corresponding to a recovery rate of 6.5% and time-at-liberty ( $\Delta T$ ) ranging from 1 to 717 d. The date of recovery was available for all but eight hake, and 22 had dubious growth probably attributable to questionable information on the date of recapture and/or errors in measurement. These 30 hake were excluded from the analysis, leaving 250 recoveries for further analysis. We observed increasing recovery rates from 2 to 13% with increasing length-at-release from 15 to 27 cm (Figure 3). At greater length, which corresponded to few tagged fish (3%) that are not depicted in Figure 3, recovery rates oscillated between 0 and 50%. As shown by the cumulative number of recaptures over time (Figure 4), 81% of recoveries were made in the first 5 months. Of the 242 recaptures assigned a sex, 130 were females and 112 were males.

Fish recovered within 30 d of tagging had null growth and were therefore excluded from subsequent analyses ( $n = 50$ ). Of the

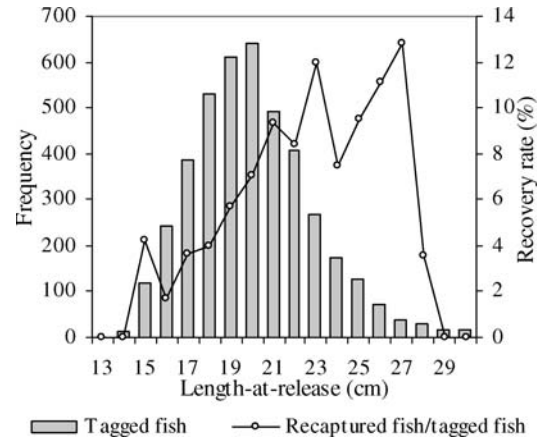

**Figure 3.** Length frequency distribution of tagged hake (total length, TL) released in the Gulf of Lions in 2006 and the distribution of recovery rates according to fish length-at-release ( $n = 280$ ). The low number (just 3%) of tagged fish with a total length  $\geq 30$  cm is not depicted.

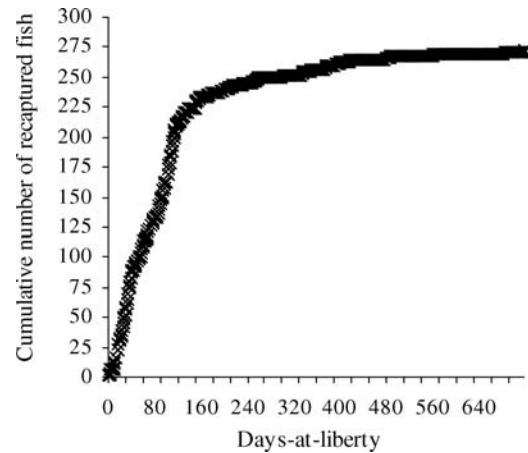

**Figure 4.** Cumulative number of recoveries ( $n = 272$ ) from the 2006 tagging experiment in the Gulf of Lions plotted against time-at-liberty.

balance of 200 recoveries (71% of the total), 108 were females, with a TL at release of 15–44 cm (mean 21 cm), 85 were males with a TL at release of 15–27 cm (mean 21 cm), and 7 were fish whose sex could not be determined. The TL at recapture ranged from 17 to 57 cm for females and from 16 to 39 cm for males, and the average time-at-liberty was 141 d for females and 121 d for males. Only eight females and six males spent more than 1 year free.

Daily growth rates were normally distributed. Mean growth rates per day, month, and year are given in Table 1 for combined and separated sexes. The mean daily growth rate differed significantly between sexes ( $t = 3.933$ ,  $p < 0.001$ ), a feature that could not be explained by either length-at-release or time-at-liberty because mean values of those two factors were similar in males and females.

Mean growth rates in relation to time-at-liberty and length-at-release are given separately by sex in Table 2. The mean growth rate of females  $< 30$  cm length-at-release was significantly ( $t = 2.484$ ,  $p < 0.005$ ) higher in those that spent more than 1 year free than in

**Table 1.** Mean values, standard errors (s.e.) of female ( $n = 108$ ), male ( $n = 85$ ), and combined sexes ( $n = 200$ ) growth rates by day, month, and year in the Gulf of Lions determined by conventional tagging.

| Unit                   | Female growth rate |        | Male growth rate |        | Combined sexes growth rate |       |
|------------------------|--------------------|--------|------------------|--------|----------------------------|-------|
|                        | Mean               | s.e.   | Mean             | s.e.   | Mean                       | s.e.  |
| cm.d <sup>-1</sup>     | 0.040              | 0.0015 | 0.031            | 0.0015 | 0.036                      | 0.001 |
| cm.month <sup>-1</sup> | 1.2                | 0.05   | 0.9              | 0.05   | 1.1                        | 0.03  |
| cm.year <sup>-1</sup>  | 14.7               | 0.5    | 11.4             | 0.5    | 13.1                       | 0.4   |

The growth rates correspond to tagged fish whose length-at-release and time-at-liberty varied, respectively, from 15 to 44 cm and from 30 to 717 d.

**Table 2.** Mean values, standard error (s.e.), and sample size ( $n$ ) of female and male daily growth rates (cm d<sup>-1</sup>) in the Gulf of Lions in terms of time-at-liberty and length-at-release.

| Factor                            | Female growth rate |       |        | Male growth rate |       |        |
|-----------------------------------|--------------------|-------|--------|------------------|-------|--------|
|                                   | $n$                | Mean  | s.e.   | $n$              | Mean  | s.e.   |
| Length-at-release/time-at-liberty |                    |       |        |                  |       |        |
| < 30 cm / < 1 year                | 98                 | 0.040 | 0.0016 | 79               | 0.031 | 0.0016 |
| < 30 cm / ≥ 1 year                | 7                  | 0.048 | 0.0029 | 6                | 0.026 | 0.0041 |
| > 30 cm / ≥ 1 year                | 1                  | 0.027 | -      | -                | -     | -      |
| Total                             | 106                |       |        | 85               |       |        |
| Length-at-release category        |                    |       |        |                  |       |        |
| 15–19 cm                          | 29                 | 0.040 | 0.0028 | 24               | 0.034 | 0.0031 |
| 20–24 cm                          | 67                 | 0.041 | 0.0018 | 52               | 0.031 | 0.0021 |
| 25–29 cm                          | 9                  | 0.040 | 0.0050 | 9                | 0.026 | 0.0050 |
| 30–44 cm                          | 3                  | 0.026 | 0.0087 | -                | -     | -      |
| Total                             | 108                |       |        | 85               |       |        |

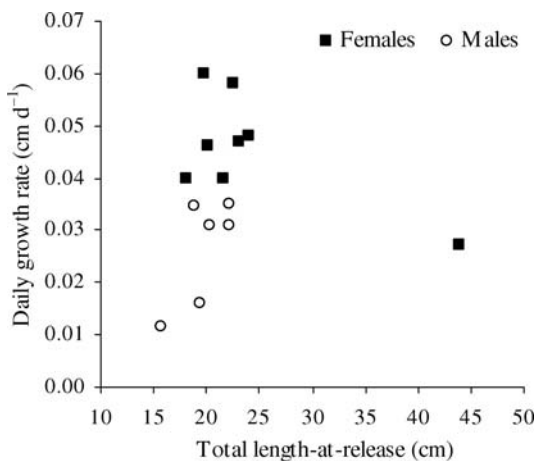

**Figure 5.** Daily growth rates for hake recaptured after more than 1 year free ( $n = 14$ ) plotted against total length-at-release.

those that spent less than 1 year free. In males, the reverse was observed, but there the difference was not significant. These growth differences between sexes should be viewed in relation to the maturity already reached at that length for males and not for females. There was a significant difference ( $t = 4.36, p = 0.001$ ) in growth rate between females and males <30 cm length-at-release that had spent more than 1 year free (Figure 5). The single female tagged at a length >30 cm (44 cm) and recovered more than 1 year later showed a low growth rate compared with other females recovered.

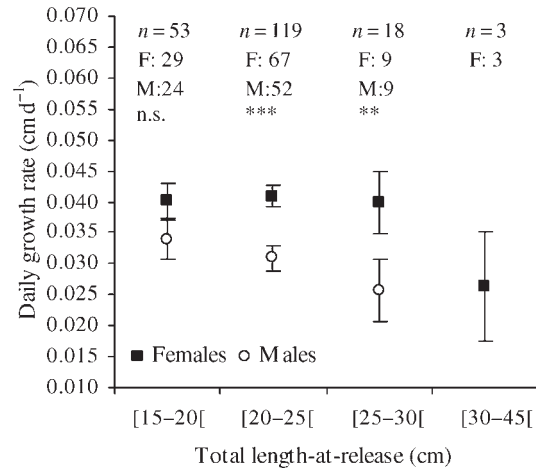

**Figure 6.** Comparison of daily growth rates (mean  $\pm$  s.e.) by size category and sex. F, females; M, males;  $n$ , number of individuals; n.s., not significant. \*\* and \*\*\* represent significant differences between females and males at  $\alpha = 0.01$  and  $0.001$ , respectively.

There was no growth difference ( $p = 0.136$ ) between sexes in the smallest length category (Figure 6), but there were significant differences in the next two length categories up ( $p < 0.001$  and  $p = 0.045$ ). Female growth rates did not differ significantly between length categories. However, there was a decrease in the largest class, which also had greater variability. A decreasing trend was observed for males through the three size categories, but differences were not significant, even between extreme classes. We noted that the mean growth rates by sex were similar in the largest length class (25–29 cm for males, 30–44 cm for females).

By fitting the von Bertalanffy function to the tagging data, the growth parameter  $k$  was first estimated for each sex separately, with fixed  $L_\infty$  (model 1), based on the earlier estimates of Aldebert and Recasens (1995). With  $L_\infty$  values of 100.7 cm for females and 72.8 cm for males,  $k$  was estimated to be  $0.236 \pm 0.009 \text{ year}^{-1}$  for females and  $0.233 \pm 0.023 \text{ year}^{-1}$  for males (Table 3). The corresponding growth models were plotted against those previously estimated by Aldebert and Recasens (1995), where  $k = 0.124 \text{ year}^{-1}$  and  $t_0 = -0.35$  for females, and  $k = 0.149 \text{ year}^{-1}$  and  $t_0 = -0.383$  for males (Figure 7). It is of note that our estimates of  $k$  were nearly double the values reported by the earlier authors.

In our second model (model 2), parameters  $k$  and  $L_\infty$  were both estimated, with  $L_\infty$  constrained to the respective ranges of 100–130 cm for females and 70–100 cm for males. Standard errors (Table 3) were higher for both sexes than in model 1 owing to the estimation of two parameters instead of one. As in model 1, the estimated  $k$  in model 2 was similar between sexes, but lower than in model 1, and because  $L_\infty$  and  $k$  are negatively correlated (Francis, 1988),  $L_\infty$  estimates for both sexes were also higher in model 2 than in model 1. As von Bertalanffy parameters were estimated from a limited dataset and available fishery data report maximum lengths of 98 cm for females and 60 cm for males (Recasens *et al.*, 1998; Jadaud *et al.*, 2006), we considered model 1 as the most reliable.

To compare hake growth between the Gulf of Lions and the Bay of Biscay, we fitted a model to sex-combined data, fixing  $L_\infty$  at 110 cm (de Pontual *et al.*, 2006). The Atlantic value of  $L_\infty$  for

**Table 3.** Hake growth parameters estimated from a tag-recapture experiment in the Gulf of Lions (s.e., standard error;  $n$ , sample size),  $L_\infty$  fixed in models 1 and 3,  $L_\infty$  constrained in model 2.

| Sex and model            | Method                       |            |      |                           |       |            |                                  |             |                  |
|--------------------------|------------------------------|------------|------|---------------------------|-------|------------|----------------------------------|-------------|------------------|
|                          | $L_\infty$ bounds            | $L_\infty$ | s.e. | $k$ (year <sup>-1</sup> ) | s.e.  | $k_{\min}$ | $k_{\max}$ (year <sup>-1</sup> ) | $r^2$ ANOVA | $r^2$ parameters |
| Females ( $n = 108$ )    |                              |            |      |                           |       |            |                                  |             |                  |
| Model 1 (bootstrap)      | $L_\infty$ fixed             | 100.7      | –    | 0.236                     | 0.009 | 0.220      | 0.252                            | 0.87        | –                |
| Model 2 (bootstrap)      | $100 \leq L_\infty \leq 130$ | 114.6      | 14.0 | 0.197                     | 0.030 | 0.135      | 0.258                            | 0.87        | –0.98            |
| Males ( $n = 85$ )       |                              |            |      |                           |       |            |                                  |             |                  |
| Model 1 (bootstrap)      | $L_\infty$ fixed             | 72.8       | –    | 0.233                     | 0.023 | 0.210      | 0.0256                           | 0.70        | –                |
| Model 2 (bootstrap)      | $70 \leq L_\infty \leq 100$  | 83.0       | 13.6 | 0.192                     | 0.044 | 0.103      | 0.281                            | 0.70        | –0.95            |
| Both sexes ( $n = 200$ ) |                              |            |      |                           |       |            |                                  |             |                  |
| Model 3 (asymptotic)     | $L_\infty$ fixed             | 110        | –    | 0.178                     | 0.005 | 0.168      | 0.187                            | 0.78        | –                |

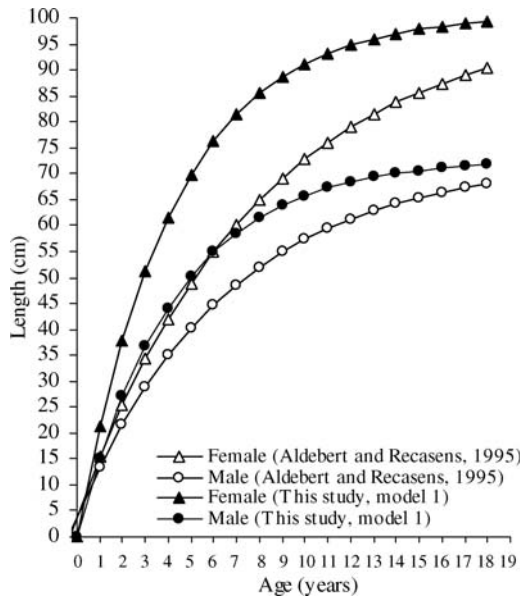

**Figure 7.** A von Bertalanffy growth model fitted to recapture data (tagging survey 2006) in the Gulf of Lions for female ( $L_\infty = 100.7$ ;  $k = 0.236$  year<sup>-1</sup>) and male hake ( $L_\infty = 72.8$ ;  $k = 0.233$  year<sup>-1</sup>) compared with the growth model of Aldebert and Recasens (1995), of female ( $L_\infty = 100.7$ ;  $k = 0.124$  year<sup>-1</sup>,  $t_0 = -0.350$ ) and male hake ( $L_\infty = 72.8$ ;  $k = 0.149$  year<sup>-1</sup>,  $t_0 = -0.383$ ).

combined sexes was higher than those chosen separately for females ( $L_\infty = 100.7$  cm) and males ( $L_\infty = 72.8$  cm) in our model 2. However, the only way to compare  $k$  in both areas was to retain this large value of  $L_\infty$  from the Atlantic. In the third model (model 3),  $k$  in the Gulf of Lions was estimated at  $0.178 \pm 0.005$  year<sup>-1</sup>, a value lower than that obtained by de Pontual *et al.* (2006) in the Bay of Biscay ( $0.25 \pm 0.026$  year<sup>-1</sup>; Table 4, Figure 8).

## Discussion

Our study has provided a validated growth model for Mediterranean hake, based on tagging data from juveniles and adults of a maximum recapture size 57 cm TL for females and 39 cm TL for males. In von Bertalanffy growth modelling, high values of  $k$  obtained regardless of the fitted model indicate that hake are fast-growing. In model 1, the  $k$  value is twice that reported in an earlier study on hake from the same area using different methodologies but the same  $L_\infty$  (Aldebert and Recasens, 1995).

**Table 4.** Growth parameters for hake in the Gulf of Lions and Bay of Biscay (F, female; M, male; U, undetermined sex; LFA, length frequency analysis; T, tagging; s.e., standard error).

| Sex     | $L_\infty$ | $k \pm$ s.e.      | Method | References                      |
|---------|------------|-------------------|--------|---------------------------------|
| F       | 100.7      | 0.124             | LFA    | Aldebert and Recasens (1995)    |
| F       | 100.7      | $0.236 \pm 0.007$ | T      | This study, Model 1             |
| M       | 72.8       | 0.149             | LFA    | Aldebert and Recasens (1995)    |
| M       | 72.8       | $0.233 \pm 0.011$ | T      | This study, Model 1             |
| F+ M+ U | 110        | $0.250 \pm 0.026$ | T      | de Pontual <i>et al.</i> (2006) |
| F+ M+ U | 110        | $0.178 \pm 0.005$ | T      | This study, Model 3             |

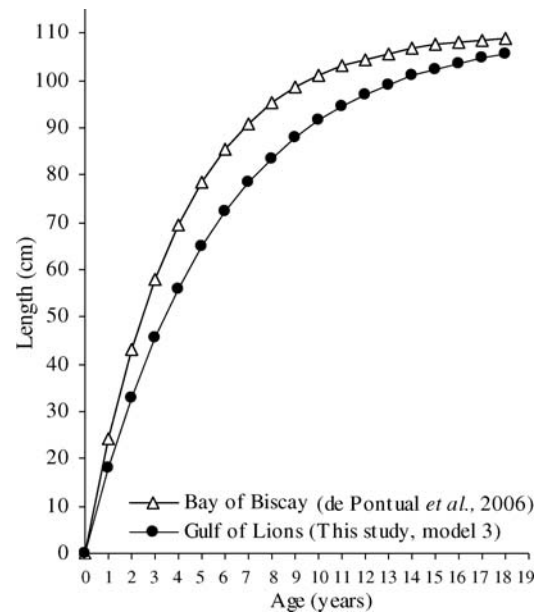

**Figure 8.** Comparison of von Bertalanffy growth models in the Bay of Biscay ( $L_\infty = 110$ ;  $k = 0.25$  year<sup>-1</sup>;  $n = 15$ ) and the Gulf of Lions ( $L_\infty = 110$ ;  $k = 0.178$  year<sup>-1</sup>;  $n = 200$ ) fitted from recapture data for both sexes combined.

Interestingly, the Aldebert and Recasens (1995) estimate of  $L_\infty$  is within our  $L_\infty$  CIs estimated in model 2, indicating some consistency in estimation. These relatively broad values of CI can be explained by an absence of older hake in the sample. Moreover, our  $k$  estimates are close to those obtained in southern areas using other methodologies, in the Balearic Sea (Alemany and

Oliver, 1995), in Santa Pola Bay (Garcia-Rodriguez and Esteban, 1996, 1998), and in the Gulf of Alicante (Garcia-Rodriguez and Esteban, 2002; Table 5). In all other Mediterranean areas, values of  $k$  reported are  $\sim 0.1 \text{ year}^{-1}$  (Fiorentino *et al.*, 2000), half our estimate made from recoveries.

Length at the end of the first year of life in the Gulf of Lions was estimated at 15.1 cm for males and 21.2 cm for females (model 1, Figure 7, Table 6), similar in terms of growth rate to that found for females in the Balearic Sea (20.6 cm) by Alemany and Oliver (1995). These values are higher than previous estimates (13.6 cm for males and 15.5 cm for females) for the Gulf of Lions (Aldebert and Recasens, 1995), but consistent with the estimate of Morales-Nin and Aldebert (1997) in the same area (16 cm, sexes combined). However, given the variability in growth rates estimated from recoveries, we did not observe any statistical difference in growth rate between sexes for fish of length  $< 20$  cm (Figure 6), i.e. juveniles. Further, our results agree with length estimates based on otolith microstructure analysis of juveniles in other Mediterranean areas, but differ from those from the Atlantic. In the Catalan Sea, seasonal growth rates reported by Morales-Nin and Moranta (2004) yielded an approximated length of 20 cm at the end of the first year. Length at age 1 was estimated to be 16 cm in the central Adriatic (Arneri and Morales-Nin, 2000), 17 cm in the Aegean Sea (Uçkun *et al.*, 2000), and 18 cm in the Tyrrhenian Sea (Belcari *et al.*, 2006). In the Atlantic, reported length-at-age 1 is  $\sim 24$  cm (Kacher and Amara, 2005; de Pontual *et al.*, 2006) and 25.3 cm (Piñeiro *et al.*, 2008), values close to that (23.6 cm) reported by Garcia-Rodriguez and Esteban (2002) for the Gulf of Alicante in the Mediterranean, a value based on length frequency analysis.

We found evidence for different growth patterns between sexes in fish  $> 20$  cm  $TL$  at the beginning of the second year of life, with lower growth rates in males than females in the size range 20–30 cm. This is consistent with sexual dimorphism for

size-at-first-maturity,  $L_{50}$ , i.e. 28 and 38 cm for males and females, respectively, in the Gulf of Lions (Recasens *et al.*, 1998). For both sexes, decreasing growth rates coincide with the onset of sexual maturity, which is explained by the portion of the metabolic rate devoted to reproduction rather than somatic growth (West *et al.*, 2001). The mean growth rate of males of 25–30 cm  $TL$  is similar to that of females of 30–45 cm  $TL$ . Such sexual dimorphism for growth in the second year of life has already been documented by Garcia-Rodriguez and Esteban (1996) for Santa Paola Bay, by Garcia-Rodriguez and Esteban (2002) for the Gulf of Alicante, and by Colloca *et al.* (2003) for the central Tyrrhenian Sea. At age 2, total lengths are 37.9 cm for females and 27.1 cm for males (model 1, Figure 7); such a female size would correspond to previous estimates for age 3 in the Gulf of Lions (Aldebert and Recasens, 1995; Recasens *et al.*, 1998) or even age 4 or 5 in other Mediterranean areas (Andaloro *et al.*, 1985; Biagi *et al.*, 1998; Tursi *et al.*, 1998; Colloca *et al.*, 2003).

In the Bay of Biscay, growth rates estimated from an ensemble of recoveries were  $0.039 \pm 0.005 \text{ cm d}^{-1}$  ( $n = 8$ ) for females,  $0.029 \pm 0.006 \text{ cm d}^{-1}$  ( $n = 7$ ) for males, and  $0.038 \pm 0.004 \text{ cm d}^{-1}$  ( $n = 20$ ) for both sexes combined (de Pontual *et al.*, 2006). Such data suggest that fish tagged in the Gulf of Lions grew at the same rate as those tagged in the Bay of Biscay. However, when only fish that spent a significant time at liberty ( $> 1$  year) were considered, tagged fish grew more slowly in the Gulf of Lions (sexes combined,  $0.038 \pm 0.004 \text{ cm d}^{-1}$ ,  $n = 13$ ) than those in the Bay of Biscay (sexes combined,  $0.054 \pm 0.004 \text{ cm d}^{-1}$ ,  $n = 6$ ). A comparable result was obtained off Northwest Iberia (sexes combined,  $0.052 \pm 0.003 \text{ cm d}^{-1}$ ) despite the fewer ( $n = 2$ ) recoveries (Piñeiro *et al.*, 2007). Moreover,  $k$  values estimated with a common and fixed  $L_{\infty}$  (model 3) are lower in the Gulf of Lions ( $k = 0.178 \pm 0.005 \text{ year}^{-1}$ ) than in the Bay of Biscay ( $k = 0.25 \pm 0.026 \text{ year}^{-1}$ ; de Pontual *et al.*, 2006). This result suggests that European hake grow faster in the

**Table 5.** Growth parameters for hake in the Mediterranean (F, female; M, male).

| Sex | $L_{\infty}$ (cm) | $k$ ( $\text{year}^{-1}$ ) | Programme | Area                    | Source                                    |
|-----|-------------------|----------------------------|-----------|-------------------------|-------------------------------------------|
| F   | 105               | 0.20                       | Elefan    | Santa Paola Bay (Spain) | Garcia-Rodriguez and Esteban (1996, 1998) |
| F   | 99.7              | 0.153                      | Fishparm  | Santa Paola Bay (Spain) | Garcia-Rodriguez and Esteban (1996, 1998) |
| F   | 102–116           | 0.22–0.17                  | Elefan    | Gulf of Alicante        | Garcia-Rodriguez and Esteban (2002)       |
| F   | $126.9 \pm 45.7$  | $0.184 \pm 0.094$          | Fishparm  | Balearic Sea            | Alemany and Oliver (1995)                 |
| M   | 90                | 0.19                       | Elefan    | Santa Paola Bay (Spain) | Garcia-Rodriguez and Esteban (1996, 1998) |
| M   | 73.3              | 0.172                      | Fishparm  | Santa Paola Bay (Spain) | Garcia-Rodriguez and Esteban (1996, 1998) |
| M   | 86–94             | 0.23–0.27                  | Elefan    | Gulf of Alicante        | Garcia-Rodriguez and Esteban (2002)       |

**Table 6.** Estimated length for ages 1–5 from the von Bertalanffy function for females, males, and sexes combined.

|              | Gulf of Lions |                |                |       |                |                | Bay of Biscay<br>Sexes combined | Gulf of Lions<br>Sexes combined |
|--------------|---------------|----------------|----------------|-------|----------------|----------------|---------------------------------|---------------------------------|
|              | Females       |                |                | Males |                |                |                                 |                                 |
|              | (1)           | (2)<br>Model 1 | (2)<br>Model 2 | (1)   | (2)<br>Model 1 | (2)<br>Model 2 |                                 |                                 |
| $L_{\infty}$ | 100.7         | 100.7          | 114.6          | 72.8  | 72.8           | 70.0           | 110                             | 110                             |
| $k$          | 0.124         | 0.236          | 0.197          | 0.149 | 0.239          | 0.255          | 0.25                            | 0.183                           |
| Age 1        | 15.5          | 21.2           | 20.5           | 13.6  | 15.1           | 14.5           | 24.3                            | 17.9                            |
| Age 2        | 25.5          | 37.9           | 37.3           | 21.8  | 27.1           | 26.5           | 43.3                            | 32.9                            |
| Age 3        | 34.2          | 51.1           | 51.1           | 28.8  | 36.6           | 36.3           | 58.0                            | 45.5                            |
| Age 4        | 42.0          | 61.5           | 62.5           | 34.9  | 44.1           | 44.5           | 69.5                            | 56.0                            |
| Age 5        | 48.8          | 69.8           | 71.8           | 40.2  | 50.1           | 51.2           | 78.5                            | 64.8                            |

(1) Aldebert and Recasens (1995), (2) this study (models 1–3), and (3) de Pontual *et al.* (2006).

Atlantic than in the Mediterranean. In both areas, males mature smaller than females, although the values of  $L_{50}$  differ: 37.8 cm for males and 48.8 cm for females in the Bay of Biscay (Lucio *et al.*, 2000). This led to estimates of age-at-first-maturity in this area of 1+ and 2+ for males and females, respectively (de Pontual *et al.*, 2006). Faster growth in the Bay of Biscay could be explained by genetic factors, because the Atlantic and Mediterranean host separate stocks of hake (Cimmaruta *et al.*, 2005), and/or by the effects of environmental factors such as temperature and food availability. The temperature in the Gulf of Lions rarely falls below 13°C, whereas in the Bay of Biscay it can decrease to a minimum range of 8.0–9.5°C (Puillat *et al.*, 2004). A relatively stable thermocline appears in the Gulf of Lions in summer and autumn, and the water column homogenizes in winter. Water temperature over the thermocline may reach 20–25°C and is constant below it, ~13–13.5°C (Lefevre *et al.*, 1997). Thermal stratification is also observed in summer and autumn in the Bay of Biscay, where the temperature is cooler on average than in the Mediterranean Sea. In areas of cooler bottom temperature (8–10°C), silver hake (*Merluccius bilinearis*) is not only larger and more abundant, but also grows faster (Steves and Cowen, 2000). However, a recent experiment on captive hake in controlled conditions has suggested that the species could be more eurythermal than previously thought (pers. obs.). Trophic conditions might well be another driving factor for growth. This hypothesis is supported by the greater productivity of Atlantic (Laborde *et al.*, 1999) than Mediterranean waters (Lefevre *et al.*, 1997), and in areas such as Namibia, the high productivity of the waters may explain the fast growth of shallow-water Cape hake (*Merluccius capensis*; Gordo *et al.*, 2001).

Comparing our results with those published for different areas is problematic because of the different methodological approaches used (length frequency analysis, otolith macrostructure, tagging, etc.), the different sampling strategies (Orsi-Relini *et al.*, 1991), the uncertainties involved in the otolith age-estimation method, which is both complex and non-validated (Morales-Nin and Aldebert, 1997; Morales-Nin *et al.*, 1998; de Pontual *et al.*, 2006), and confounding factors influencing growth (sex, season, area, etc.). In most studies, although the sexes were identified, lengths were generally pooled and a mean growth rate was given over different length ranges. When we compared growth rates in the Gulf of Lions with those in the Bay of Biscay based on pooled data from recaptured fish, mean growth appeared similar. However, when we separated fish that had spent more or less than 1 year at liberty, there was a significant difference between the two areas. This clearly highlights the need for further work based on validated methodologies and reliable data.

Hake are the demersal fish most sought by trawlers, gillnetters, and longliners in the Mediterranean, and the stocks are assessed regularly by the General Fisheries Commission for the Mediterranean (GFCM). From de Pontual *et al.* (2006) and the present study, hake are assumed to grow faster than previously estimated. Growth underestimation has clearly been demonstrated, through marked otolith analysis, to result from age-overestimation attributable to biased age estimation (de Pontual *et al.*, 2006). This clearly places in question the reliability of current estimates of stock demographic structure, and a shift towards higher relative frequencies of youngest age groups is expected. Such a bias would most probably impact the stock assessment results of the GFCM (Jadaud *et al.*, 2006). As shown by Bertignac and de Pontual (2007), bias in age estimation strongly impacts absolute levels of fishing mortality ( $F$ ) and spawning-

stock biomass (SSB). In terms of temporal trends, SSB is also affected, whereas  $F$  and recruitment are broadly similar to previous estimates. In the Mediterranean Sea, the bulk of hake trawl catches (the most commonly used fishing method) is assumed to be made up of age groups 0 and 1 but, according to the fast-growth hypothesis presented here, would be made up by the recruits of the year. Such a growth rate also produces a shift in the age-at-first-maturity towards younger ages in both sexes, more precisely at 2 instead of 3 or 4 years, as reported previously. As shown by Bertignac and de Pontual (2007), this would result in greater reactivity of the population to both environmental change and new management measures.

In conclusion, our results strongly support the fast-growth hypothesis proposed by Alemany and Oliver (1995) and Garcia-Rodriguez and Esteban (1996, 1998, 2002) in the Mediterranean. Growth depends on sex, and male and female growth rates clearly differ in the Gulf of Lions from the second year of life, when the fish first mature. Despite growth differences between the Bay of Biscay and the Gulf of Lions, hake would mature at about the same age (2 years) in both areas. Hake growth in the Gulf of Lions is some twice as fast as previously published, but slower than in the Bay of Biscay. Combined factors, including temperature, greater production in the area, and genetics, may contribute to explaining the higher growth rate observed in the Atlantic. The maximum length of the hake we recovered in the Gulf of Lions may have introduced some bias against older ages because von Bertalanffy modelling provides an accurate description of growth over the range of lengths to which it has been fitted (Kirkwood, 1983). Such a shortcoming could be solved by tagging large hake. Inconsistency between estimated growth rates, brought to light by other authors (Aldebert, 1993; Fiorentino *et al.*, 2000), strengthens the argument for further research to understand better both hake biology and its complex otolith pattern.

## Acknowledgements

We thank all those who participated in the tagging experiment (Ysabelle Cheret, Carole Leite, Hervé Barone, Cyril Przybyla, Patrick Le Gall, Alain Guillou, Aurélie Dessin, and Thibault Geoffroy), and the fishers who returned the tagged fish. We also thank our colleague Serge Mortreux for developing the gear we used, the crew of the RV “L’Europe” for their valued assistance during the MERVIV survey, and Yvonne Aldebert for her frequent encouragement and advice on hake growth. Comments by García Rodríguez, an anonymous reviewer, and the editor were also helpful in improving the manuscript. Finally, we thank Helen McCombie for her review of the English text. The study was funded by the Ifremer–MEDICIS programme.

## References

- Aldebert, Y. 1993. La croissance de *Merluccius merluccius* (L.) en Méditerranée. Bilan des Connaissances, Vigo, 13–17 décembre 1993. 14 pp.
- Aldebert, Y., and Carries, C. 1988. Problèmes d’exploitation du merlu dans le golfe du Lion. FAO Fisheries Report, 395: 87–91.
- Aldebert, Y., and Recasens, L. 1995. Estimation de la croissance du merlu du Golfe du Lion par l’analyse des fréquences de tailles. Rapport de la Commission Internationale de la Mer Méditerranée, 34: 236.
- Aldebert, Y., and Recasens, L. 1996. Comparison of methods for stock assessment of European hake *Merluccius merluccius* in the Gulf of

- Lions (northwestern Mediterranean). *Aquatic Living Resources*, 9: 13–22.
- Alemany, F., and Oliver, P. 1995. Growth of female European hake in the Balearic Sea: a proposal of new growth model with higher growth rates. *Rapport de la Commission Internationale de la Mer Méditerranée*, 34: 236.
- Andaloro, F., Arena, P., and Prestipino Giarritta, S. 1985. Contribution to the knowledge of the age, growth and feeding of hake, *Merluccius merluccius* (L. 1758) in the Sicilian Channel. *FAO Fisheries Report*, 336: 93–97.
- Arneri, E., and Morales-Nin, B. 2000. Aspects of the early life history of European hake from the central Adriatic. *Journal of Fish Biology*, 56: 1368–1380.
- Belcari, P., Ligas, A., and Viva, C. 2006. Age determination and growth of juveniles of the European hake, *Merluccius merluccius* (L., 1758), in the northern Tyrrhenian Sea (NW Mediterranean). *Fisheries Research*, 78: 211–217.
- Bertignac, M., and de Pontual, H. 2007. Consequences of bias in age estimation on assessment of the northern stock of European hake (*Merluccius merluccius*) and on management advice. *ICES Journal of Marine Science*, 64: 981–988.
- Biagi, F., de Ranieri, S., Belcari, P., Bertolini, D., Chiericoni, V., Farnocchia, I., Moro, M., *et al.* 1998. Valutazioni delle risorse demersali nell'Arcipelago Toscano dall'Isola d'Elba all'Isola di Giannutri. *Biologia Marina Mediterranea*, 5: 40–52.
- Bouhlal, M., and Ktari, M. 1975. Croissance du merlu de la région du golfe de Tunis. *Bulletin de l'Institut National Scientifique et Technique d'Océanographie et de Pêche, Salammbou*, 4: 5–47.
- Cimmaruta, R., Bondanelli, P., and Nascetti, G. 2005. Genetic structure and environmental heterogeneity in the European hake (*Merluccius merluccius*). *Molecular Ecology*, 14: 2577–2591.
- Colloca, F., Gentiloni, P., Belluscio, A., Carpentieri, P., and Arduzone, G. D. 2003. Analysis and validation of annual increments in otoliths of European hake (*Merluccius merluccius*) in the central Mediterranean Sea. *Archive of Fishery and Marine Research*, 50: 175–192.
- Courbin, N., Fablet, R., Mellon, C., and de Pontual, H. 2007. Are hake otolith macrostructures randomly deposited? Insights from an unsupervised statistical and quantitative approach applied to Mediterranean hake otoliths. *ICES Journal of Marine Science*, 64: 1191–1201.
- de Pontual, H., Bertignac, M., Battaglia, A., Bavouzet, G., Moguelet, P., and Groison, A. L. 2003. A pilot tagging experiment on European hake (*Merluccius merluccius*): methodology and preliminary results. *ICES Journal of Marine Science*, 60: 1318–1327.
- de Pontual, H., Groison, A. L., Pineiro, C., and Bertignac, M. 2006. Evidence of underestimation of European hake growth in the Bay of Biscay, and its relationship with bias in the agreed method of age estimation. *ICES Journal of Marine Science*, 63: 1674–1681.
- Ferraton, F., Harmelin-Vivien, M., Mellon, C., and Souplet, A. 2007. Spatio-temporal variation in diet may affect condition and abundance of juvenile European hake in the Gulf of Lions (NW Mediterranean). *Marine Ecology Progress Series*, 337: 197–208.
- Fiorentino, F., Gancitano, S., Ragonese, R., Rizzo, P., and Levi, D. 2000. How the Mediterranean hake grow? Do the available von Bertalanffy parameters describe growth of *Merluccius merluccius* adequately? Working Group on Demersals of Sub-committee on Stock Assessment of the Scientific Advisory Committee of GFCM, Sète, France. General Fisheries Commission of the Mediterranean Scientific Advisory Committee. 18 pp.
- Francis, R. I. C. C. 1988. Are growth parameters estimated from tagging and age-length data comparable? *Canadian Journal of Fisheries and Aquatic Sciences*, 45: 936–942.
- García-Rodríguez, M., and Esteban, A. 1996. On the growth of the Mediterranean hake (*Merluccius merluccius* L.) from the Santa Pola bay (S.E. Spain). In *Gutshop '96 Feeding Ecology and Nutrition in Fish Symposium Proceedings*. International Congress on the Biology of Fishes, San Francisco, 14–18 July 1996, pp. 65–69. Ed. by D. MacKinley, and K. Shearer. Physiology Section American Fisheries Society, San Francisco State University.
- García-Rodríguez, M., and Esteban, A. 1998. Biometric relationships and growth of hake (*Merluccius merluccius* L.) from the Alicante Gulf. *Rapport de la Commission Internationale de la Mer Méditerranée*, 35: 434–435.
- García-Rodríguez, M., and Esteban, A. 2002. How fast does hake grow? A study on the Mediterranean hake (*Merluccius merluccius* L.) comparing whole otoliths readings and length frequency distributions data. *Scientia Marina*, 66: 145–156.
- Gordoa, A., Raventos, N., and Dealie, F. 2001. Comparison between micro- and macro-structure readings in the age estimations of Cape hake. *Journal of Fish Biology*, 59: 1153–1163.
- Jadaud, A., Mellon, C., Farrugio, H., Guijarro, B., Valls, M., Massutí, E., Ordinas, F., *et al.* 2006. Stock assessment of the French–Spanish shared stock of hake (*Merluccius merluccius*) in the Gulf of Lions. Rome, Working Document to the General Fisheries Commission of the Mediterranean Scientific Advisory Council Working Group on the Assessment of Demersal Stocks. 28 pp.
- Kacher, M., and Amara, R. 2005. Distribution and growth of 0-group European hake in the Bay of Biscay and Celtic Sea: a spatial and inter-annual analysis. *Fisheries Research*, 71: 373–378.
- Kirkwood, G. P. 1983. Estimation of von Bertalanffy growth curve parameters using both length increment and age-length data. *Canadian Journal of Fisheries and Aquatic Sciences*, 40: 1405–1411.
- Laborde, P., Urrutia, J., and Valencia, V. 1999. Seasonal variability of primary production in the Cap-Ferret Canyon area (Bay of Biscay) during the ECOFER cruises. *Deep Sea Research II: Topical Studies in Oceanography*, 46: 2057–2079.
- Lefevre, D., Minas, H. J., Minas, M., Robinson, C., le B., Williams, P. J., and Woodward, E. M. S. 1997. Review of gross community production, primary production, net community production and dark community respiration in the Gulf of Lions. *Deep Sea Research II*, 44: 801–832.
- Lucio, P., Murua, H., and Santurtun, M. 2000. Growth and reproduction of hake (*Merluccius merluccius*) in the Bay of Biscay during the period 1996–1997. *Ozeanografika*, 3: 325–354.
- Morales-Nin, B., and Aldebert, Y. 1997. Growth of juvenile *Merluccius merluccius* in the Gulf of Lions (NW Mediterranean) based on otolith microstructure and length-frequency analysis. *Fisheries Research*, 30: 77–85.
- Morales-Nin, B., and Moranta, J. 2004. Recruitment and post-settlement growth of juvenile *Merluccius merluccius* on the western Mediterranean shelf. *Scientia Marina*, 68: 399–409.
- Morales-Nin, B., Torres, G. J., Lombarte, A., and Recasens, L. 1998. Otolith growth and age estimation in the European hake. *Journal of Fish Biology*, 53: 1155–1168.
- Oliver, P., Alvarez, F., and Morales-Nin, B. 1989. Report on the age-reading workshop on Mediterranean European hake and sardine, Palma de Mallorca, Spain. *FAO Fisheries Report*, 447: 79–84.
- Oliver, P., and Massutí, E. 1995. Biology and fisheries of western Mediterranean hake (*M. merluccius*). In *Hake: Biology, Fisheries and Markets*, pp. 181–202. Ed. by J. Alheit, and T. J. Pitcher. Fish and Fisheries Series, 15. Chapman and Hall, London. 478 pp.
- Orsi-Relini, L., Cappnera, M., and Fiorentino, F. 1989. Spatial-temporal distribution and growth of *Merluccius merluccius* recruits in the Ligurian Sea. Observations on the 0 group. *Cybiurn*, 13: 263–270.
- Orsi-Relini, L., Fiorentino, F., and Zamboni, A. 1991. Growth of the Mediterranean hake. Experiences gained in the Ligurian Sea. In *Marine Eutrophication and Population dynamics*. Proceedings of the 25th European Management and Business Sciences



- Symposium, pp. 307–315. Olsen and Olsen, Fredensborg, Denmark.
- Piñeiro, C., Rey, J., de Pontual, H., and Garcia, A. 2008. Growth of Northwest Iberian juvenile hake estimated by combining sagittal and transversal otolith microstructure analyses. *Fisheries Research*, 93: 173–178.
- Piñeiro, C., Rey, J., Marín, M., de Pontual, H., and Goñi, R. 2007. Tag and recapture of European hake (*Merluccius merluccius* L.) off the northwest Iberian Peninsula: first results support fast growth hypothesis. *Fisheries Research*, 88: 150–154.
- Puillat, I., Lazure, P., Jégou, A. M., Lampert, L., and Miller, P. I. 2004. Hydrographical variability on the French continental shelf in the Bay of Biscay, during the 1990s. *Continental Shelf Research*, 24: 1143–1163.
- Recasens, L. 1992. Dinamica de poblaciones i pesqueria del lluc (*Merluccius merluccius*) al Golfo de Leon i la mar Catalana. PhD thesis, Universitat de Barcelona. 398 pp.
- Recasens, L., Lombarte, A., Morales-Nin, B., and Torres, G. J. 1998. Spatiotemporal variation in the population structure of the European hake in the NW Mediterranean. *Journal of Fish Biology*, 53: 387–401.
- SPSS. 2008. SPSS Statistics 17.0, Rel. 17.0.7, 23 August 2008. SPSS Inc., Chicago.
- Steves, B. P., and Cowen, R. K. 2000. Settlement, growth, and movement of silver hake *Merluccius bilinearis* in nursery habitat on the New York Bight continental shelf. *Marine Ecology Progress Series*, 196: 279–290.
- Tursi, A., Matarrese, A., D'Onghia, G., and Maiorano, P. 1998. Sintesi delle ricerche sulle risorse demersali del Mar Ionio (da Capo Otranto a Capo Passero) realizzate nel periodo 1985–1997. *Biologia Marina Mediterranea*, 5: 120–129.
- Uçkun, D., Togulga, M., and Taskavak, E. 2000. A preliminary study on the growth of the common hake (*Merluccius merluccius* L., 1758) in Izmir Bay, Aegean Sea. *Acta Adriatica*, 41: 25–34.
- West, G. B., Brown, J. H., and Enquist, B. J. 2001. A general model for ontogenetic growth. *Nature*, 413: 628–631.

doi:10.1093/icesjms/fsp215
